# Supplementary material
Source: Springer Nature journal article supplement (https://www.springermedizin.de/resource/supplementary/12887_2005_99_MOESM4_ESM.pdf/9477266)
Supplement: MOESM4 [file 9477266]

### Haemoglobin < 11 g/dL

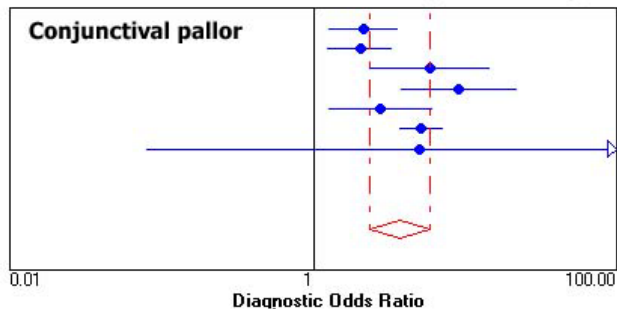

#### Diagnostic OR (95% CI)

|                  |      |                 |
|------------------|------|-----------------|
| Getaneh 2000     | 2.16 | (1.28 - 3.63)   |
| Kalter 1997      | 2.05 | (1.25 - 3.36)   |
| Luby 1995        | 5.88 | (2.36 - 14.64)  |
| Sdepanian 1996 a | 9.18 | (3.77 - 22.35)  |
| Sdepanian 1996 b | 2.80 | (1.26 - 6.23)   |
| Thaver 1994      | 5.18 | (3.74 - 7.19)   |
| Wurapa 1986      | 5.00 | (0.08 - 316.69) |

Random Effects Model  
 Pooled Diagnostic Odds Ratio = 3.69 (2.33 to 5.84)  
 Cochran-Q = 19.20; df = 6 (p = 0.0038)

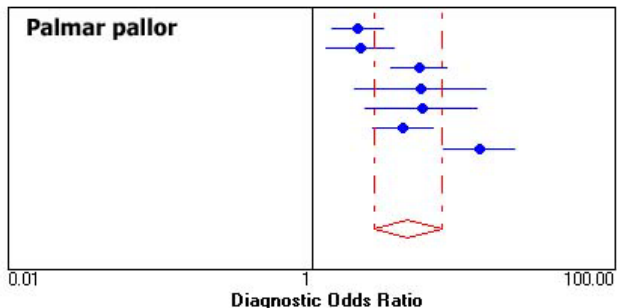

#### Diagnostic OR (95% CI)

|                  |       |                |
|------------------|-------|----------------|
| Getaneh 2000     | 2.02  | (1.35 - 3.03)  |
| Kalter 1997      | 2.12  | (1.25 - 3.60)  |
| Luby 1995        | 5.15  | (3.32 - 7.99)  |
| Sdepanian 1996 a | 5.26  | (1.93 - 14.35) |
| Sdepanian 1996 b | 5.32  | (2.24 - 12.67) |
| Thaver 1994      | 4.03  | (2.52 - 6.43)  |
| Wamae 2000       | 12.86 | (7.42 - 22.30) |

Random Effects Model  
 Pooled Diagnostic Odds Ratio = 4.30 (2.58 to 7.17)  
 Cochran-Q = 36.17; df = 6 (p = 0.0000)

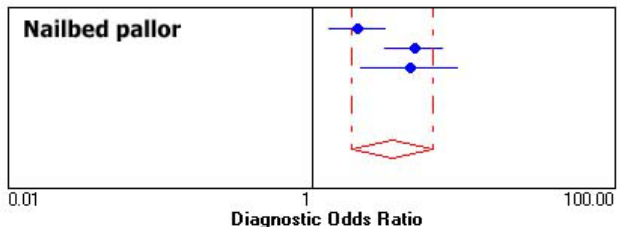

#### Diagnostic OR (95% CI)

|              |      |               |
|--------------|------|---------------|
| Getaneh 2000 | 2.00 | (1.29 - 3.09) |
| Luby 1995    | 4.75 | (3.06 - 7.37) |
| Thaver 1994  | 4.43 | (2.12 - 9.24) |

Random Effects Model  
 Pooled Diagnostic Odds Ratio = 3.40 (1.83 to 6.31)  
 Cochran-Q = 8.52; df = 2 (p = 0.0141)
